# Supplementary material for: In Vitro Study of Ineffective Erythropoiesis in Thalassemia: Diverse Intrinsic Pathophysiological Features of Erythroid Cells Derived from Various Thalassemia Syndromes
Source: MDPI journal article supplement (doi:10.3390/jcm11185356), 2022-09-13

**Supplemental Table S1.** Thalassemia patients' characteristics.

|                                                  | Age<br>(yr) | Gender | Hb level<br>(g/dl) * | Age at<br>onset (yr) | Age at first<br>transfusion (yr) | Requirement<br>for transfusion # | Size of spleen (cm)<br>or splenectomized | Growth development † |        |
|--------------------------------------------------|-------------|--------|----------------------|----------------------|----------------------------------|----------------------------------|------------------------------------------|----------------------|--------|
|                                                  |             |        |                      |                      |                                  |                                  |                                          | Height               | Weight |
| Hemoglobin H disease                             |             |        |                      |                      |                                  |                                  |                                          |                      |        |
| H-1                                              | 10          | Female | 7.9                  | 4                    | None                             | None                             | 2                                        | 91%                  | 78%    |
| H-2                                              | 14          | Female | 8.4                  | 5                    | 9                                | Rare                             | < 1                                      | 97%                  | 86%    |
| H-3                                              | 9           | Male   | 9.5                  | 3                    | None                             | None                             | 1                                        | 100%                 | 100%   |
| H-4                                              | 13          | Male   | 9.7                  | 6                    | None                             | None                             | 6                                        | 93%                  | 85%    |
| H-5                                              | 14          | Female | 9.8                  | 1                    | None                             | None                             | 5                                        | 98%                  | 87%    |
| Hemoglobin H-Constant Spring disease             |             |        |                      |                      |                                  |                                  |                                          |                      |        |
| HCS-1                                            | 9           | Female | 6.9                  | 5                    | 5                                | Frequent                         | 8                                        | 97%                  | 90%    |
| HCS-2                                            | 8           | Female | 7.3                  | 1                    | 5                                | Frequent                         | Splenectomized                           | 95%                  | 95%    |
| HCS-3                                            | 11          | Male   | 7.9                  | 6                    | 6                                | Occasional                       | 7                                        | 95%                  | 84%    |
| HCS-4                                            | 8           | Male   | 8.2                  | 6                    | 7                                | Occasional                       | < 1                                      | 98%                  | 94%    |
| HCS-5                                            | 7           | Male   | 8.5                  | 4                    | 5                                | Occasional                       | < 1                                      | 100%                 | 100%   |
| β <sup>0</sup> -Thalassemia/hemoglobin E disease |             |        |                      |                      |                                  |                                  |                                          |                      |        |
| BE-1                                             | 10          | Female | 6.4                  | 4                    | 5                                | Frequent                         | 7                                        | 89%                  | 75%    |
| BE-2                                             | 8           | Female | 6.8                  | 1                    | 5                                | Frequent                         | Splenectomized                           | 95%                  | 95%    |
| BE-3                                             | 11          | Female | 6.9                  | 1                    | 1                                | Frequent                         | 4                                        | 92%                  | 72%    |
| BE-4                                             | 15          | Male   | 7.9                  | 4                    | 4                                | Frequent                         | Splenectomized                           | 98%                  | 73%    |
| BE-5                                             | 12          | Male   | 8.1                  | 4                    | 5                                | Frequent                         | 5                                        | 94%                  | 86%    |
| Homozygous β <sup>0</sup> -thalassemia disease   |             |        |                      |                      |                                  |                                  |                                          |                      |        |
| BB-1                                             | 11          | Female | 4.2                  | 1                    | 1                                | Frequent                         | Splenectomized                           | 86%                  | 81%    |
| BB-2                                             | 7           | Male   | 4.8                  | 1                    | 2                                | Frequent                         | Splenectomized                           | 88%                  | 73%    |
| BB-3                                             | 7           | Male   | 5.9                  | 2                    | 3                                | Frequent                         | Splenectomized                           | 92%                  | 74%    |
| BB-4                                             | 9           | Female | 6.9                  | 1                    | 1                                | Frequent                         | 4                                        | 92%                  | 72%    |

\*Hemoglobin levels are obtained from the average hemoglobin level at a steady state or before receiving a blood transfusion. #The requirement for blood transfusion is defined by the frequency of transfusion, regular (every 2 weeks to 3 months), occasional (every 4 months to 1 year), and rare (more than 1 year). †Percentile of growth development is assessed based on weight and height measurements plotted on a Thai standard growth chart.

**Supplemental Figure S1.** Quantitative RT-PCR analysis of transcript levels of erythropoiesis modifying factors in day 8 (white bar) and day 10 (black bar) of culture as relative fold change with the mean and SD value from independent subjects of each thalassemia group compared to the normal group. N; normal, H; HbH disease, HCS; HbH-Constant Spring disease, BE;  $\beta^0$ -thalassemia/HbE disease, BB; homozygous  $\beta^0$ -thalassemia disease.

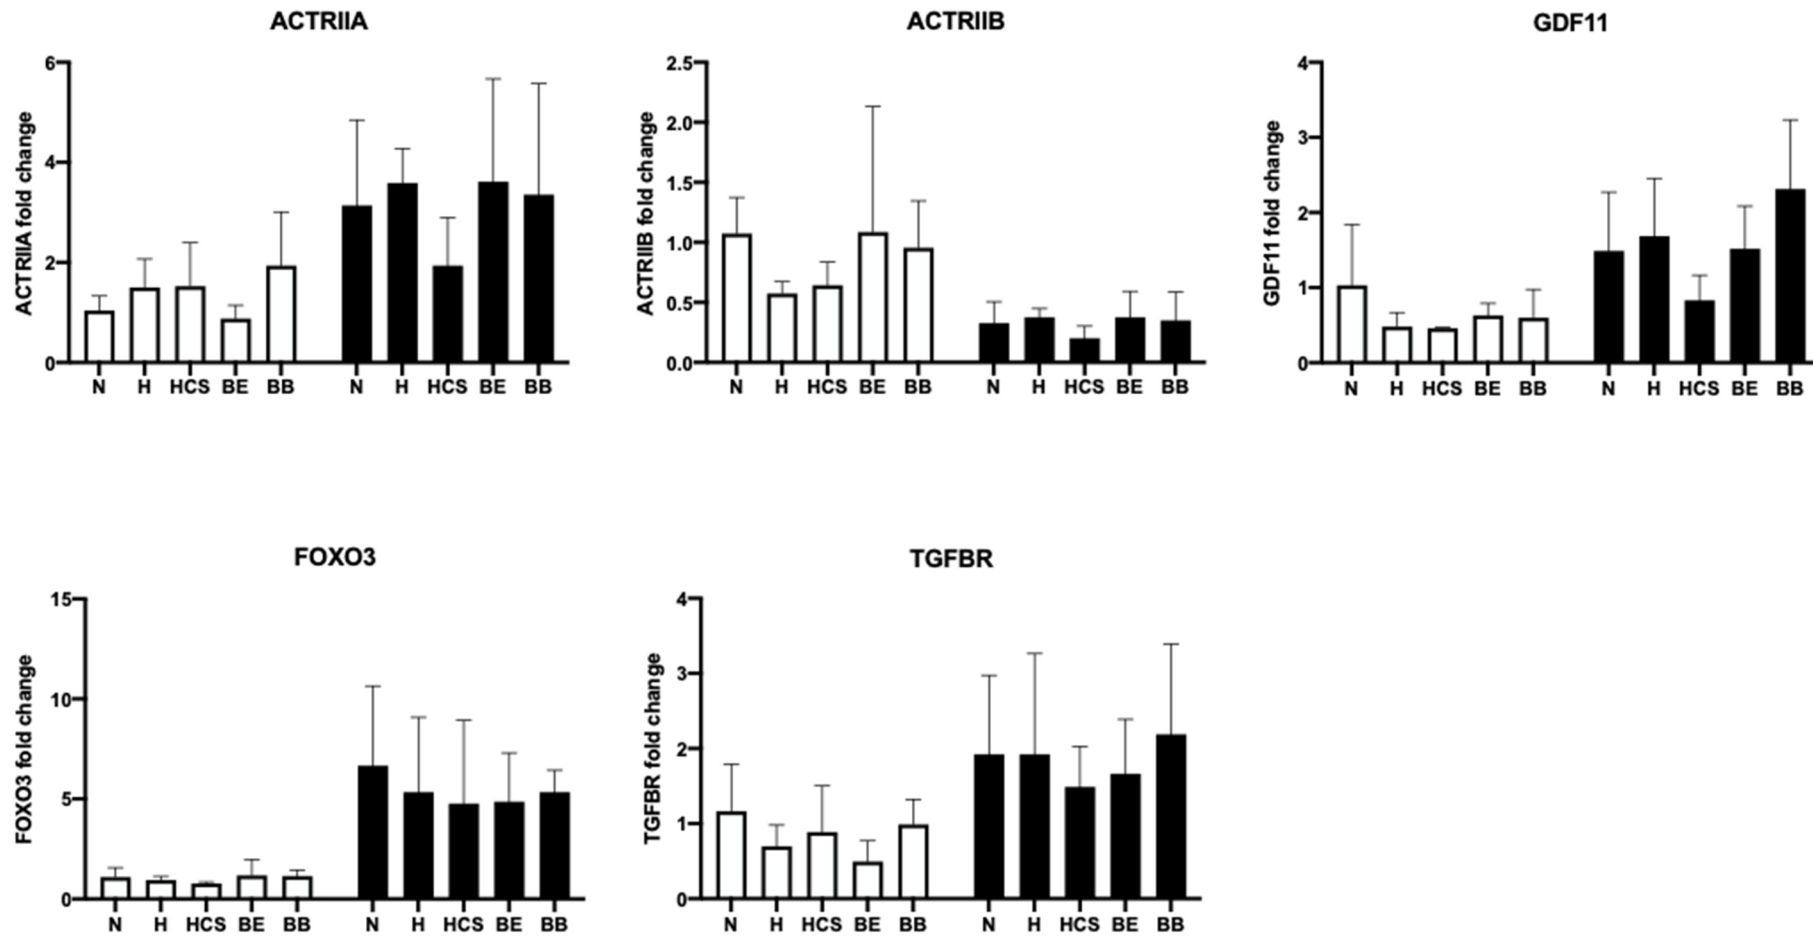

Supplement: s1 [file s1]
